# Supplementary material for: Charge transfer highways in polymer solar cells embedded with imprinted PEDOT:PSS gratings
Source: Royal Society of Chemistry journal article supplement (doi:10.1039/c4ra10268a), 2014-01-01
Supplement: c4ra10268a1.pdf [file c4ra10268a1.pdf]

## Supporting Information

### Charge transfer highways in polymer solar cells embedded with imprinted PEDOT:PSS gratings

Chia-Te Yen, Fu-Chiao Wu, Horng-Long Cheng, Hwo-Shuenn Sheu, Fu-Ching Tang,  
and Wei-Yang Chou\*

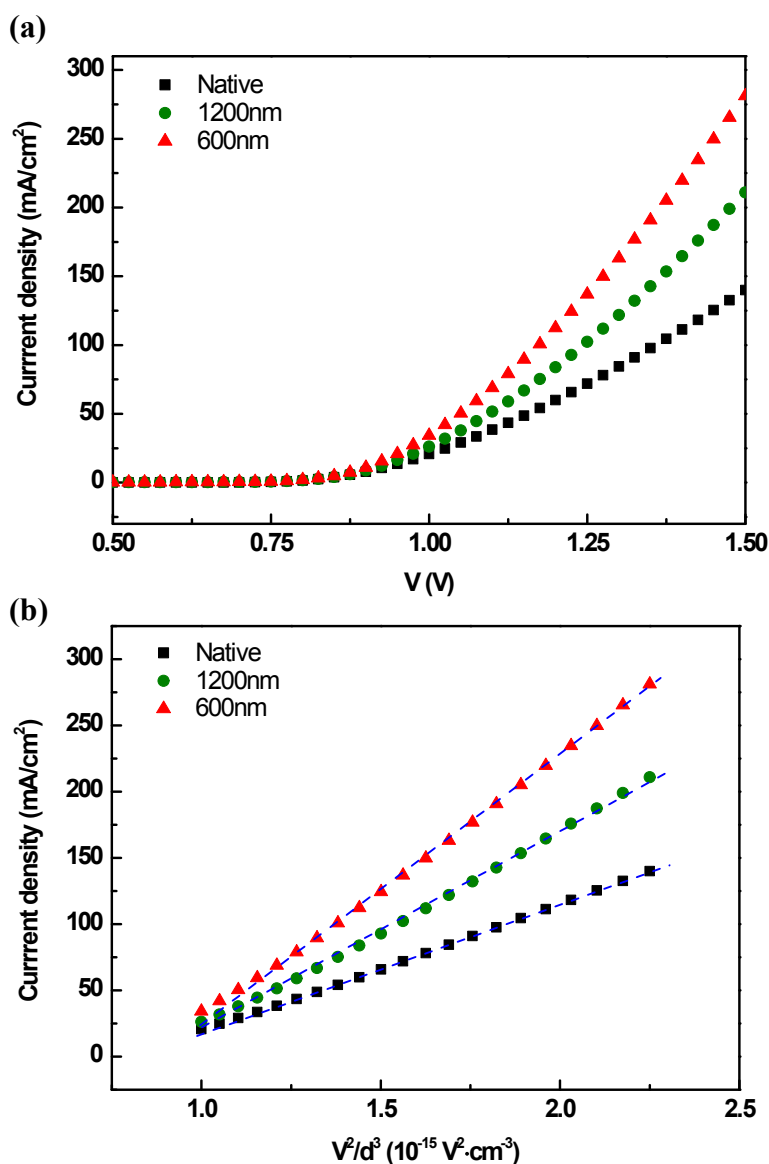

**Figure S1.** (a) The dark  $J$ - $V$  characteristic of devices with native and imprint PEDOT:PSS layers. (b) The fitting curves of  $J$  to  $V^2/d^3$  curves in which the hole mobility of P3HT/ICBA blend films can be obtained from the slop of fitting lines.

**Table S1.** Carrier mobility of P3HT/ICBA blend films formed on native, 1200 nm-wide nanograting-imprinted, and 600 nm-wide nanograting-imprinted PEDOT:PSS surfaces.

|                                                               | Native      | 1200 nm     | 600 nm      |
|---------------------------------------------------------------|-------------|-------------|-------------|
| <b>Mobility</b><br><b>(10<sup>-4</sup> cm<sup>2</sup>/Vs)</b> | <b>2.23</b> | <b>3.42</b> | <b>4.56</b> |
